# Supplementary material for: Redesigning Recombinase Specificity for Safe Harbor Sites in the Human Genome
Source: PLoS One. 2015 Sep 28;10(9):e0139123. doi: 10.1371/journal.pone.0139123 (PMC4587366; doi:10.1371/journal.pone.0139123)
Supplement: S1 Document — (DOCX) [file pone.0139123.s001.docx]

**Supplementary Data**

**Redesigning Recombinase Specificity for Safe Harbor Sites in the Human Genome**

Mark C. Wallen1, 2, 3, Thomas Gaj1, 2, 3, † and Carlos F. Barbas III1, 2, 3, ‡

1The Skaggs Institute for Chemical Biology, The Scripps Research Institute, La Jolla, CA, 92037, USA.

2Department of Chemistry, The Scripps Research Institute, La Jolla, CA, 92037, USA.

3Department of Cell and Molecular Biology, The Scripps Research Institute, La Jolla, CA, 92037, USA.

†Present address: Department of Chemical and Biomolecular Engineering, University of California, Berkeley, CA, 94720, USA.

‡Deceased

Correspondence to Mark C. Wallen: Department of Cell and Molecular Biology, The Scripps Research Institute, La Jolla, CA 92037, USA. Email: mcwallen@scripps.edu

**Short title:** Redesigning recombinase specificity

>GFP-ZFR-Bin-XbaI Fwd

TTAATTAAGAGTCTAGACGGAGGCGTGCAGAAAATAACCATTTTCTGCACGCCTCCAGATCTAGGAGGAATTTAAAATGAG

>GFP-ZFR-HindIII Rev

GATGAACTGTACAAATAACTGCAGGGAGGCGTGCAGAAAATAACCATTTTCTGCACGCCTCCCCAAGCTTCTCTAGGTCAGT

>GFP-ZFR-Bin(3,2)-XbaI Fwd

TTAATTAAGAGTCTAGACGGAGGCGTGCAGAAAANNACCATTTTCTGCACGCCTCCAGATCTAGGAGGAATTTAAAATGAG

>GFP-ZFR-Bin(6-4)-XbaI Fwd

TTAATTAAGAGTCTAGACGGAGGCGTGCAGANNNTAACCATTTTCTGCACGCCTCCAGATCTAGGAGGAATTTAAAATGAG

>GFP-ZFR-Bin(10-7)-XbaI Fwd

TTAATTAAGAGTCTAGACGGAGGCGTGNNNNAAATAACCATTTTCTGCACGCCTCCAGATCTAGGAGGAATTTAAAATGAG

>GFP-ZFR-Tn21-XbaI Fwd

TTAATTAAGAGTCTAGAAGGAGGCGTGGGTTGAGGCATACCCTAACCCACGCCTCCAGATCTAGGAGGAATTTAAAATGAG

>GFP-ZFR-Tn21-HindIII Rev

ACTGACCTAGAGAAGCTTTTGGAGGCGTGGGTTAGGGTATGCCTCAACCCACGCCTCCCTGCAGTTATTTGTACAGTTCATC

> GFP-ZFR-Tn21(3,2)-XbaI Fwd

TTAATTAAGAGTCTAGAAGGAGGCGTGGGTTGAGNNATACCCTAACCCACGCCTCCAGATCTAGGAGGAATTTAAAATGAG

> GFP-ZFR-Tn21(6-4)-XbaI Fwd

TTAATTAAGAGTCTAGAAGGAGGCGTGGGTTNNNGCATACCCTAACCCACGCCTCCAGATCTAGGAGGAATTTAAAATGAG

> GFP-ZFR-Tn21(10-7)-XbaI Fwd

TTAATTAAGAGTCTAGAAGGAGGCGTGNNNNGAGGCATACCCTAACCCACGCCTCCAGATCTAGGAGGAATTTAAAATGAG

**Table A. Primers Used in this Study.**

>TN21

MTGQRIGYIRVSTFDQNPERQLEGVKVDRAFSDKASGKDVKRPQLEALISFARTGDTVVVHSMDRLARNLDDLRRIVQTLTQRGVHIEFVKEHLSFTGEDSPMANLMLSVMGAFAEFERALIRERQREGIALAKQRGAYRGRKK

>Bin

MKIGYARVSTGLQNLNLQEDRLNQYGCEKIFSDHISGAKSKRPGLDRAIEFARSGDTIVVWRLDRLGRNMADLITLVNELNNRGVSFHSLEENITMDKSSSTGQLLFHLFAAFAEFERNLILERSSAGRIAARARGRYGGRPEK

>H1 zinc-finger

sGSGEPYKCPECGKSFSRSDVLVRHQRTHTGEKPYKCPECGKSFSDPGHLVRHQRTHTGEKPYKCPECGKSFSQSSHLVRHQRTHTGKKT

>Gin (H106Y)

MLIGYVRVSTNDQNTDLQRNALVCAGCEQIFEDKLSGTRTDRPGLKRALKRLQKGDTLVVWKLDRLGRSMKHLISLVGELRERGINFRSLTDSIDTSSPMGRFFFYVMGALAEMERELIIERTMAGLAAARNKGRIGGRPPK

>TN3 (G70S, D102Y, E124Q)

MRIFGYARVSTSQQSLDIQIRALKDAGVKANRIFTDKASGSSTDREGLDLLRMKVEEGDVILVKKLDRLSRDTADMIQLIKEFDAQGVAVRFIDDGISTDGYMGQMVVTILSAVAQAERRRILQRTNEGRQEAKLKGIKFGRRRT

>Sin (Q115R)

MIIGYARVSSIDQNLERQLDNLKTFGVEKIFTEKQSGKSVENRPVFQEALNFVRMGDRFVVESIDRLGRNYDEIIETVNYLKEKDVQLMITSLPMMNEVTGNPLLDKFMKDLIIQILAMVSEQERNESKRRQAQGIQVAKEKGVYKGRPLL

>Beta (N95D)

MAKIGYARVSSKEQNLDRQLQALQGVSKVFSDKLSGQSVERPQLQAMLNYIREGDIVVVTELDRLGRNNKELTELMNAIQQKGATLEVLNLPSMDGIEDENLRRLINNLVIELYKYQAESERKRIKERQAQGIEIAKSKGKFKGRQHK

**Table B. Amino Acid Sequences of Proteins used in this Study.**
